# Supplementary material for: Tempo-Spatial Distributions and Transport Characteristics of Two Dust Events over Northern China in March 2021
Source: MDPI journal article supplement (doi:10.3390/rs14235967), 2022-11-25
Supplement: s1 [file s1]

Archive with 1 entries (1 files):
- remotesensing-1982206-supplementary.pdf
