# Supplementary material for: Tempo-Spatial Distributions and Transport Characteristics of Two Dust Events over Northern China in March 2021
Source: MDPI journal article supplement (doi:10.3390/rs14235967), 2022-11-25
Supplement: s1 [file s1 › remotesensing-1982206-supplementary.pdf]

# Supplementary Figures for “Tempo-spatial Distributions and Transport Characteristics of Two Dust Events over Northern China in March 2021 ”

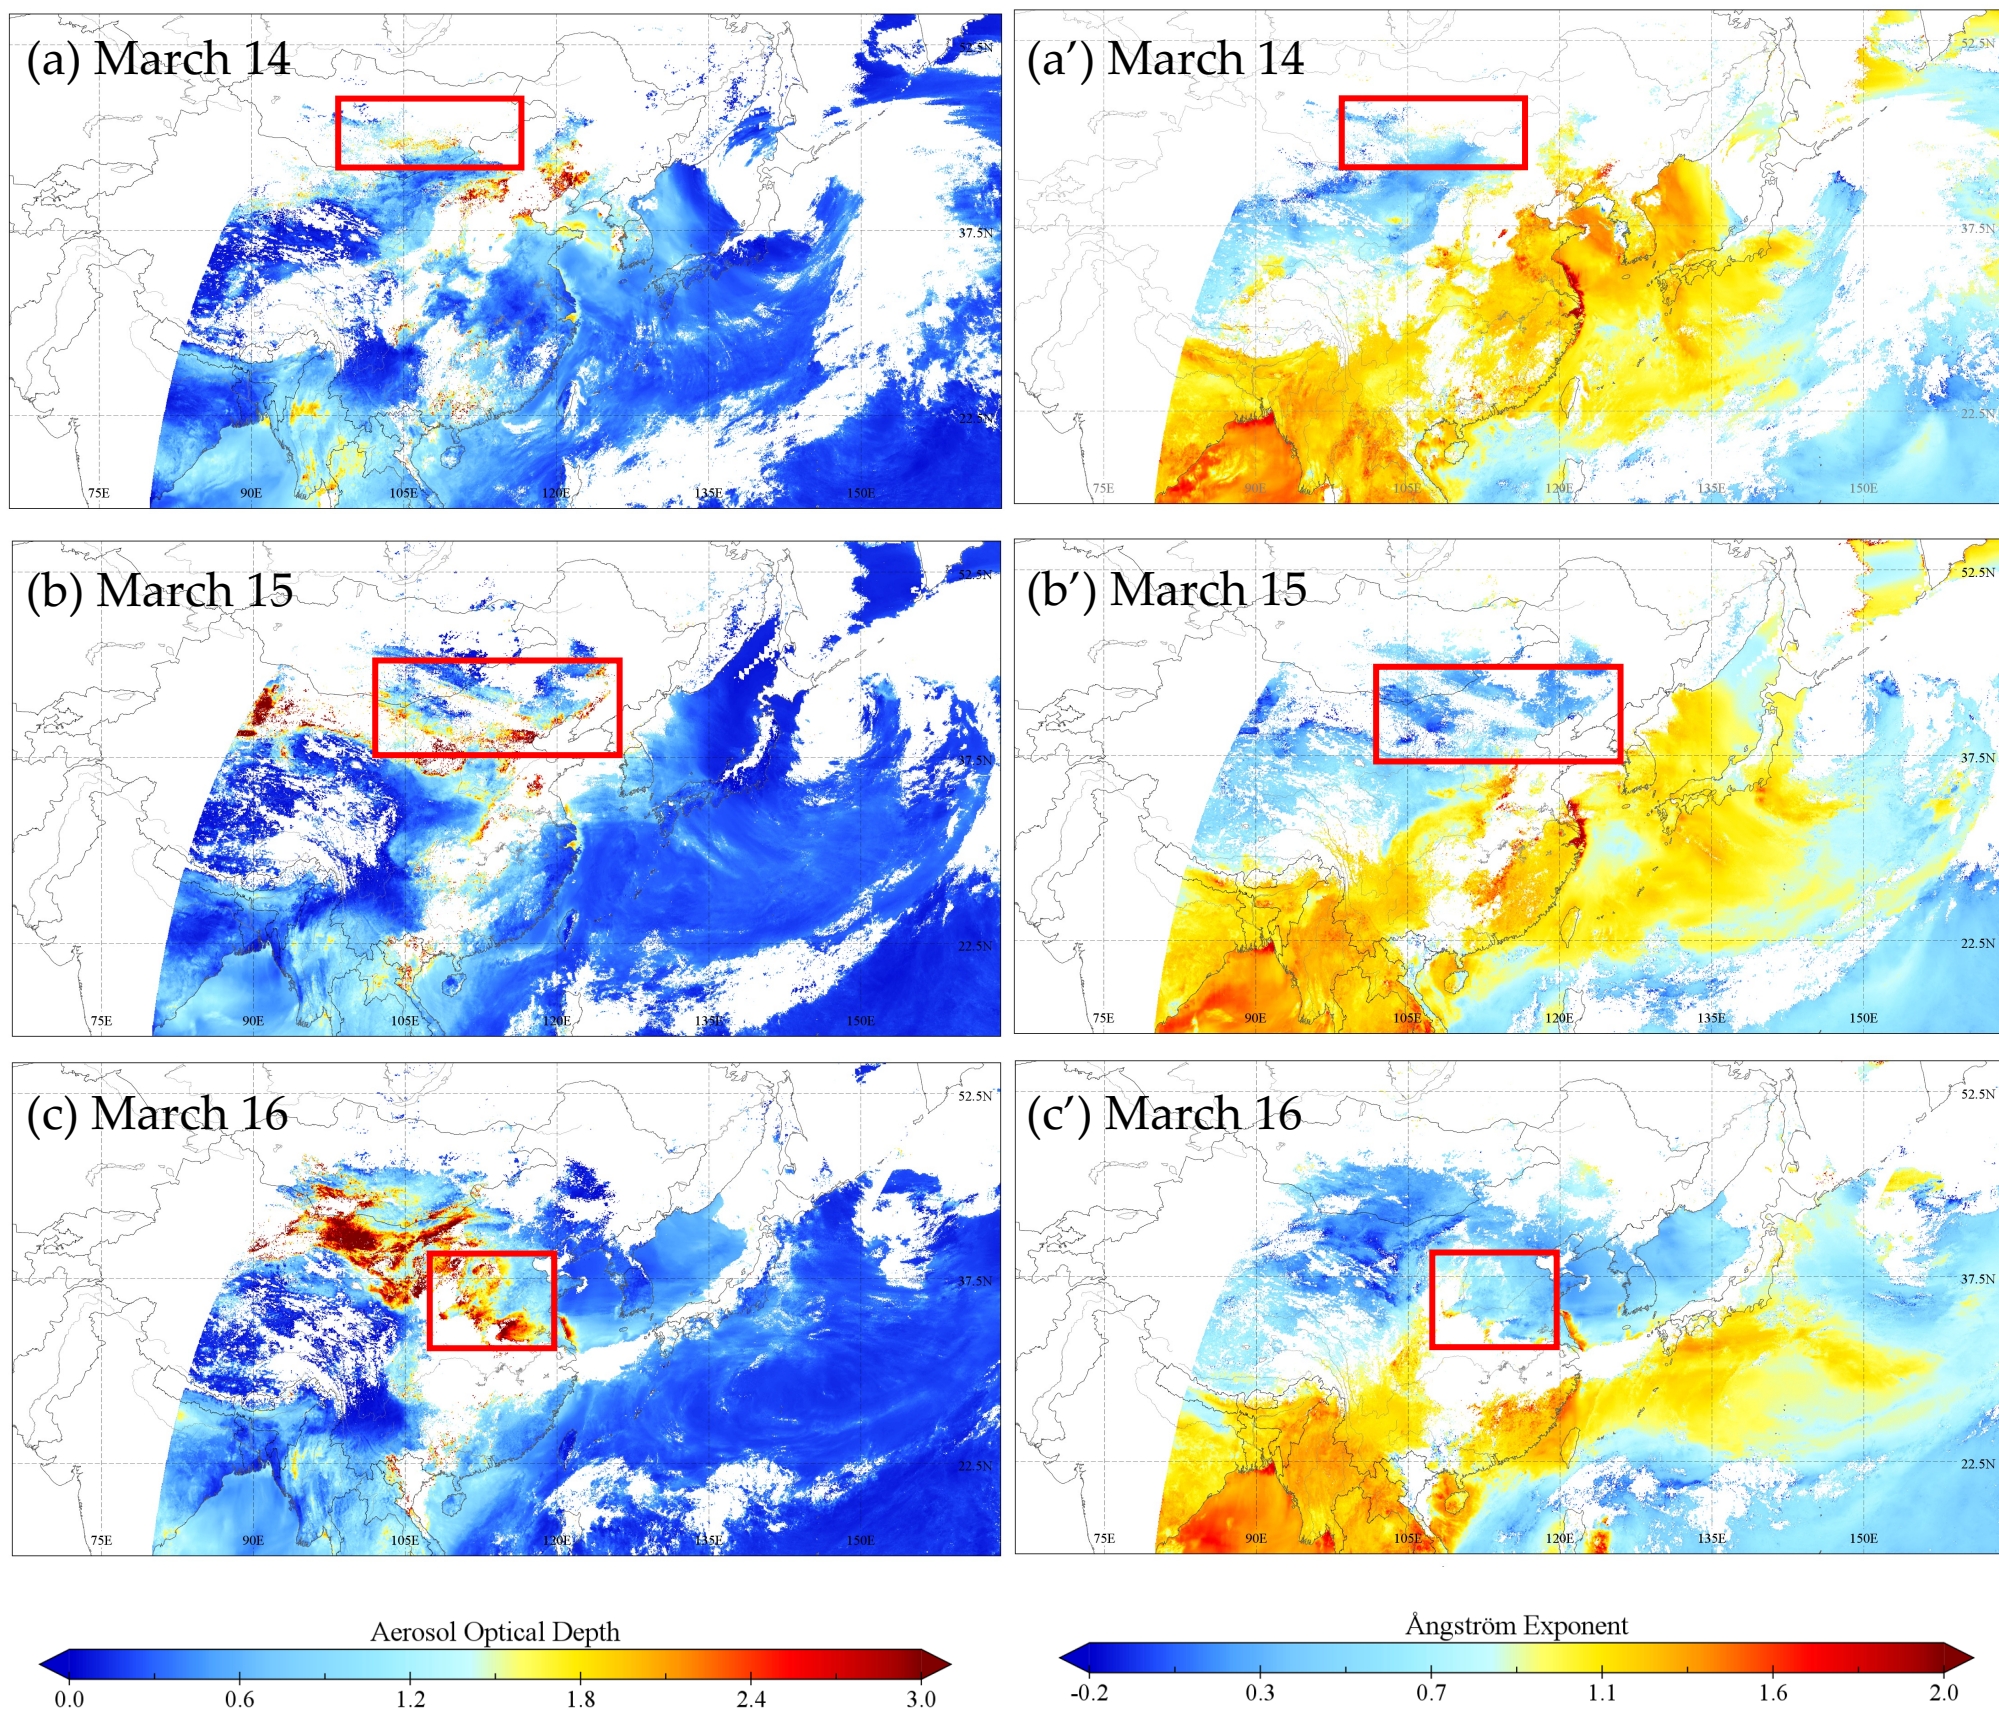

Figure S1. Himawari-8 daily average AOD distribution (left column a~c) and AE distribution (right column a'~c') during 3·15 dust event. High AOD values ( $AOD > 1.2$ ) in Red boxes corresponding the low AE values ( $AE < 0.8$ ).

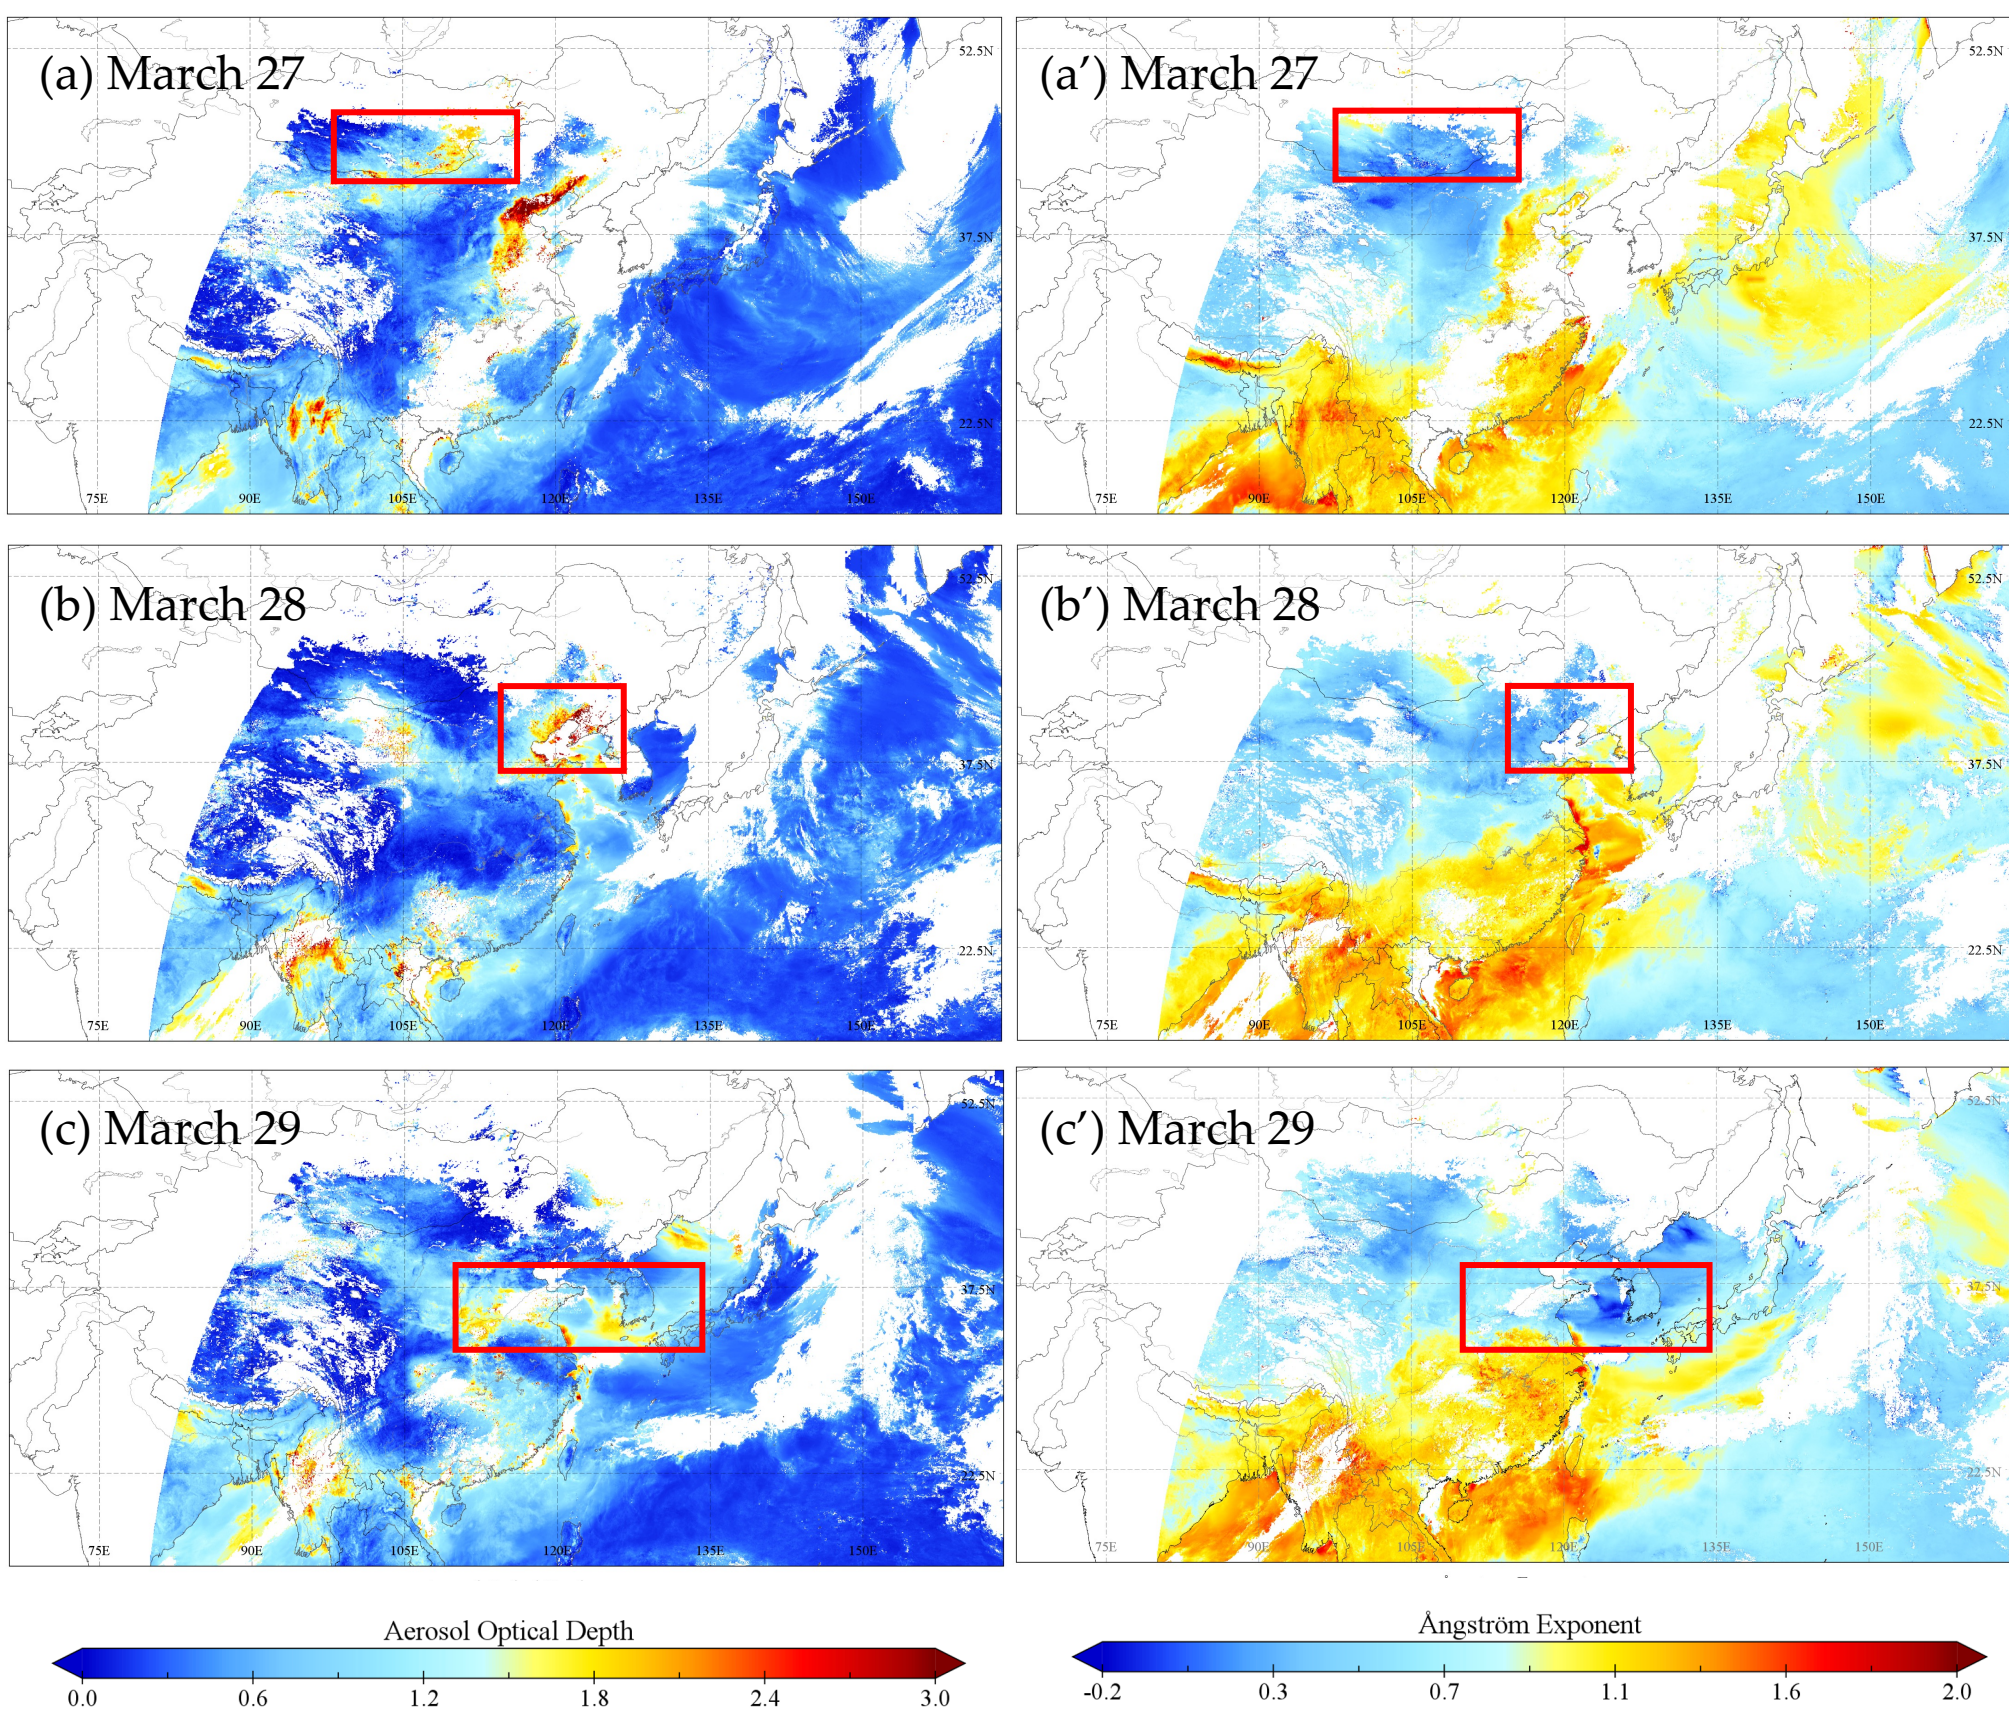

Figure S2. Himawari-8 daily average AOD distribution (left column a~c) and AE distribution (right column a'~c') during 3·28 dust event. High AOD values (AOD>1.2) in Red boxes corresponding the low AE values (AE<0.8).

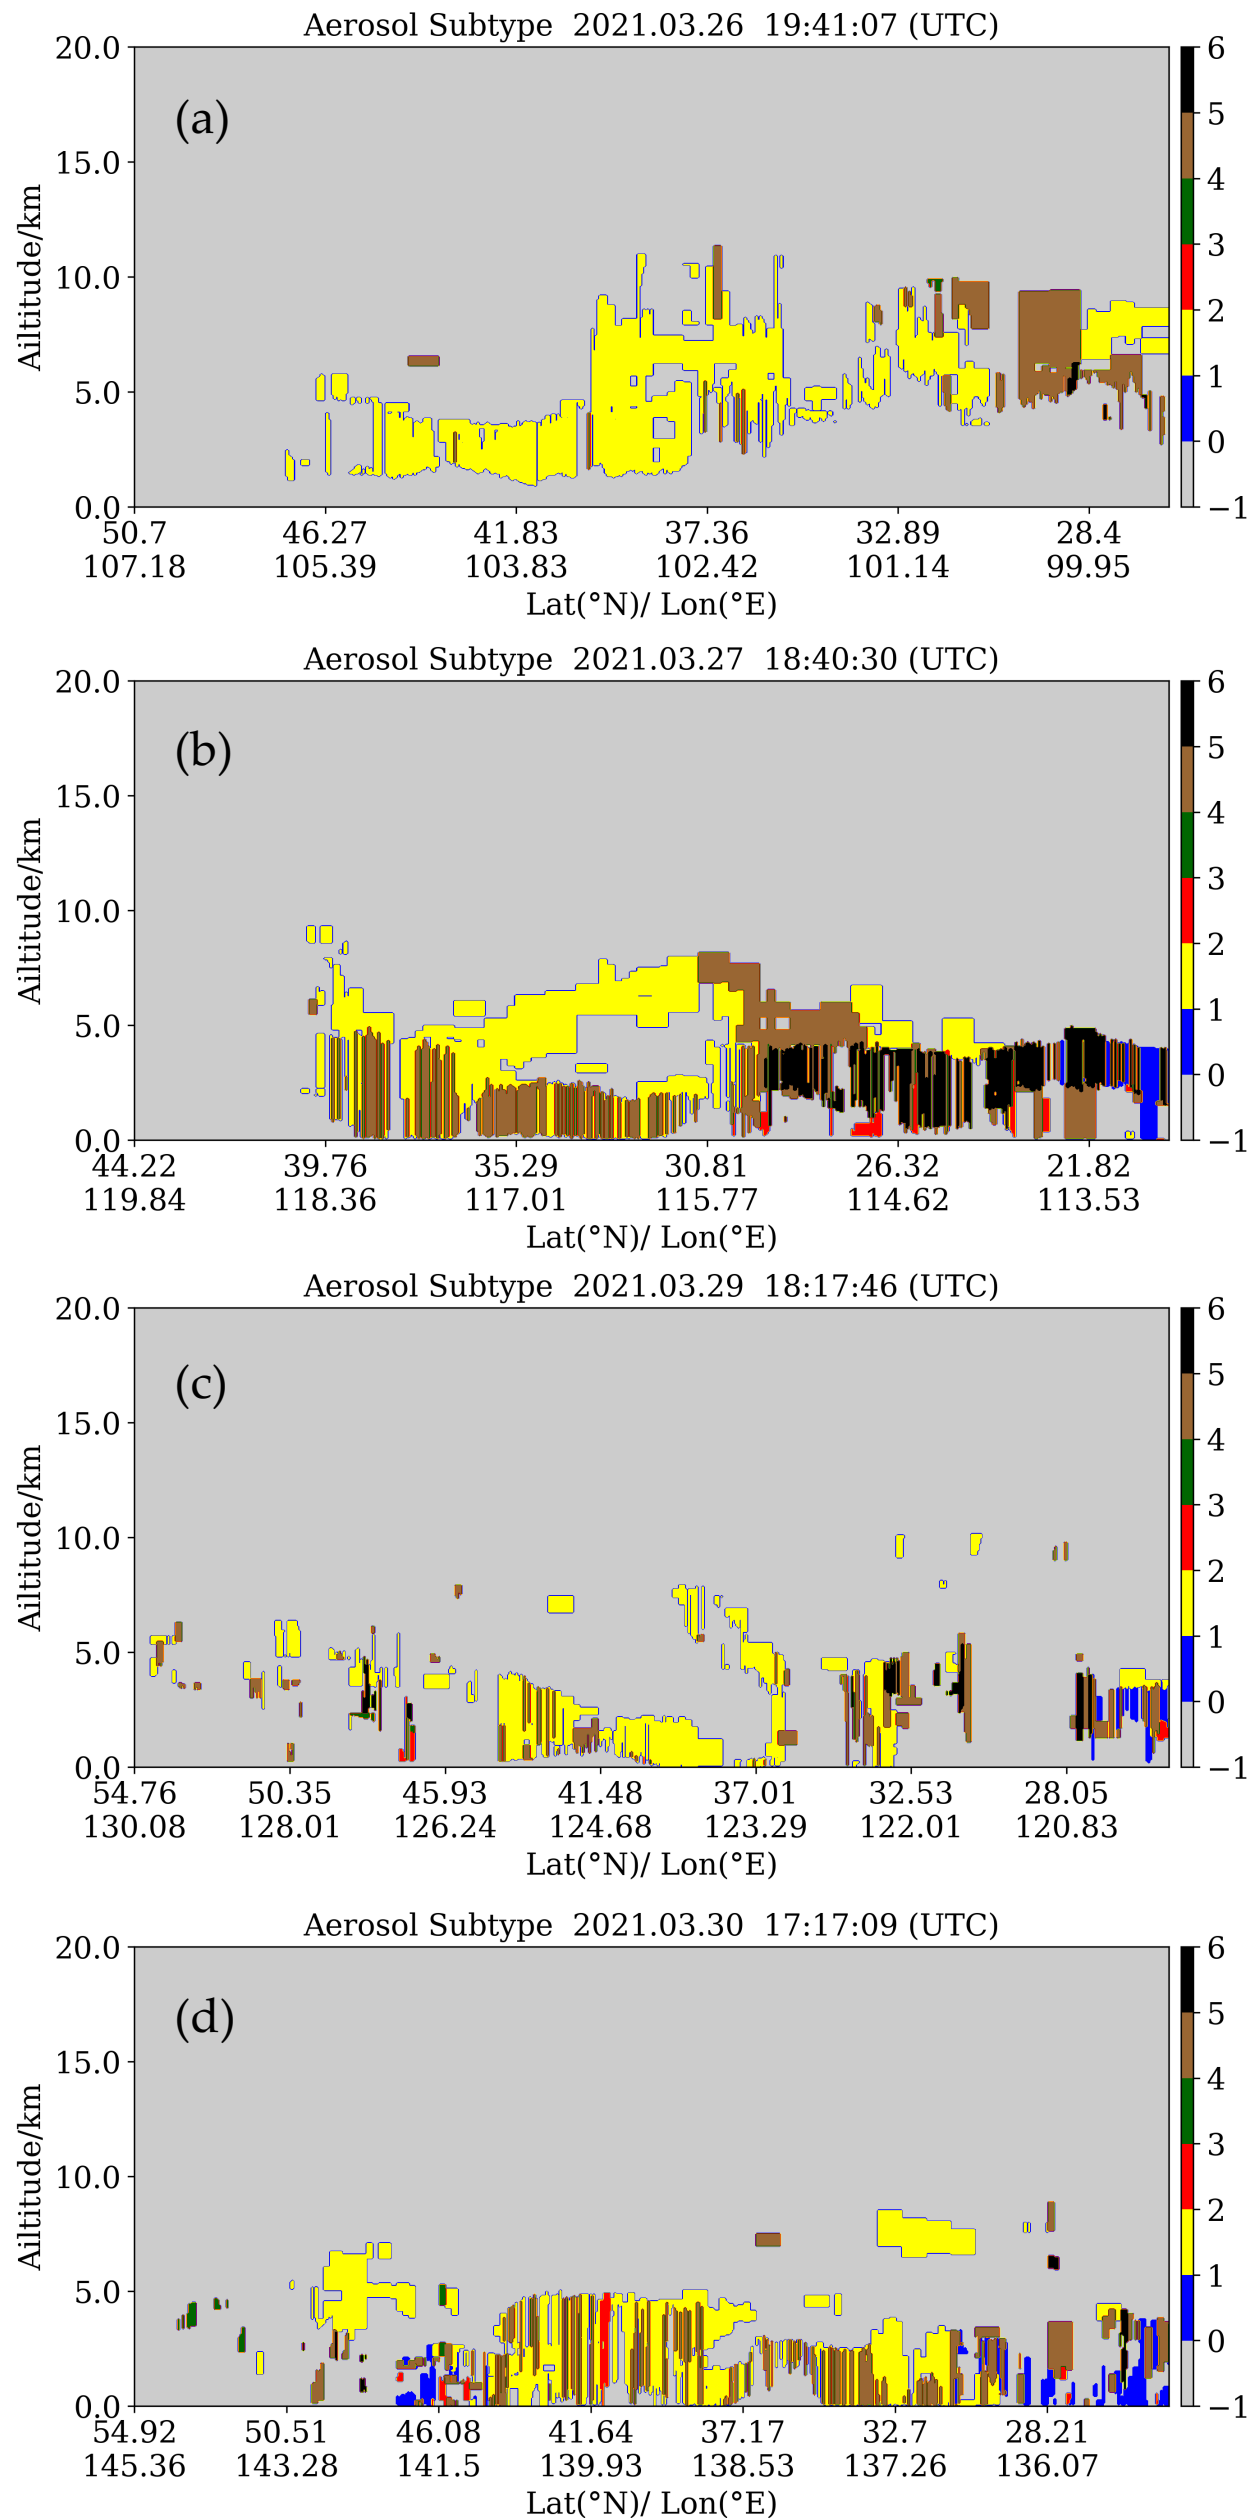

Figure S3. (a)~(d)The cross-sections of the CALIOP subtype on 26, 27, 29, and 30 March 2021, respectively.
